# Supplementary material
Source: Springer Nature journal article supplement (https://www.springermedizin.de/resource/supplementary/12891_2008_575_MOESM4_ESM.pdf/9511368)

# Spinal disease

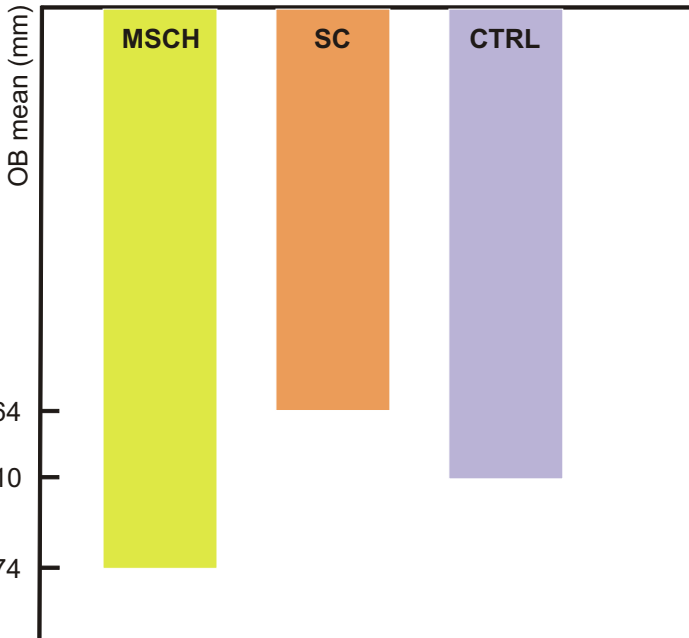

Supplement: MOESM4 [file 9511368]
